# Supplementary material for: Schwann cell-derived extracellular vesicles inhibit osteoclastogenesis through the PTEN/AKT axis in peripheral nerve-bone crosstalk
Source: Research Square preprint supplement (doi:10.21203/rs.3.rs-7516573/v1), 2025-09-22
Supplement: Supplementary file 1 [file fc8fde25cfbfea9eb3e07736.docx]

**Schwann cell-derived extracellular vesicles inhibit osteoclastogenesis through the PTEN/AKT axis in peripheral nerve-bone crosstalk**

Huijian Yang1,2,3,4,5,6✝, Biao Yu1,2,3,4,5✝, Ruiyang Li7✝, Yang Hong1,2,3,4,5✝, Mingzhu Shen1,2,3,4,5, Tianzhuo Shen1,2,3,4,5, Xiuhui Wang1,2,3,4, Han Liu1,2,3,4, Ke Xu1,2,3,4*, Yuhai Ma7*, Mengmeng Li1,2,3,4,8*, Jiacan Su1,2,3,4,7*[[1]](#footnote-0)

**Supplementary data**


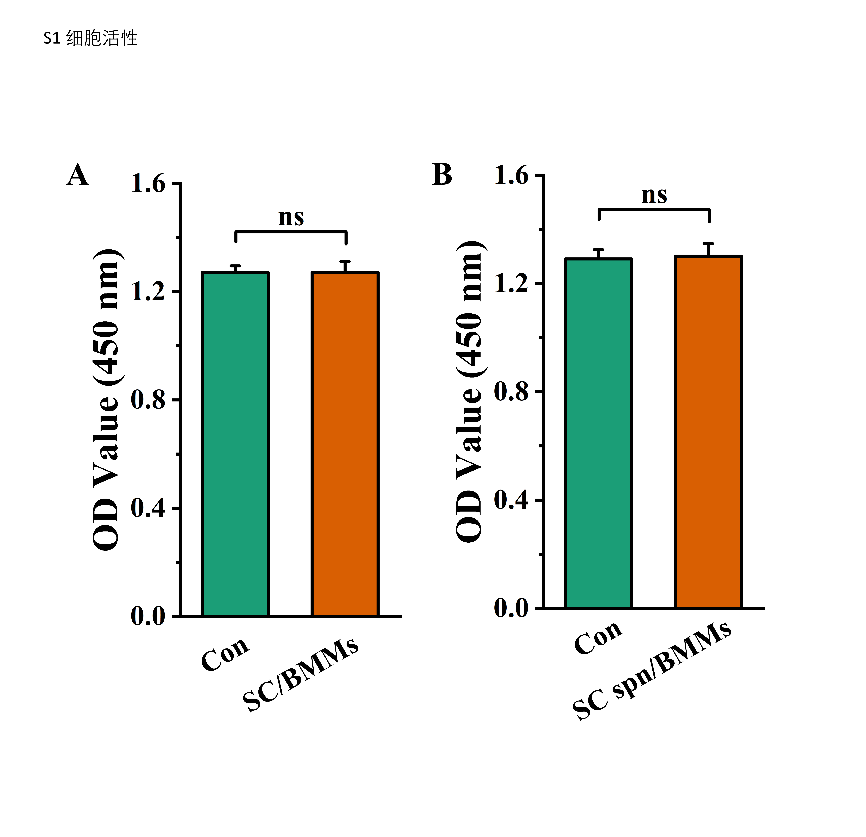


**Fig. S1** Effects of SCs and SC-CM on the viability of BMMs. **A**) Cell viability of BMMs after direct co-culture with SCs. **B**) Cell viability of BMMs after co-culture with SC-CM. n = 3, **P < 0.05*, ***P < 0.01*, ****P < 0.001*.


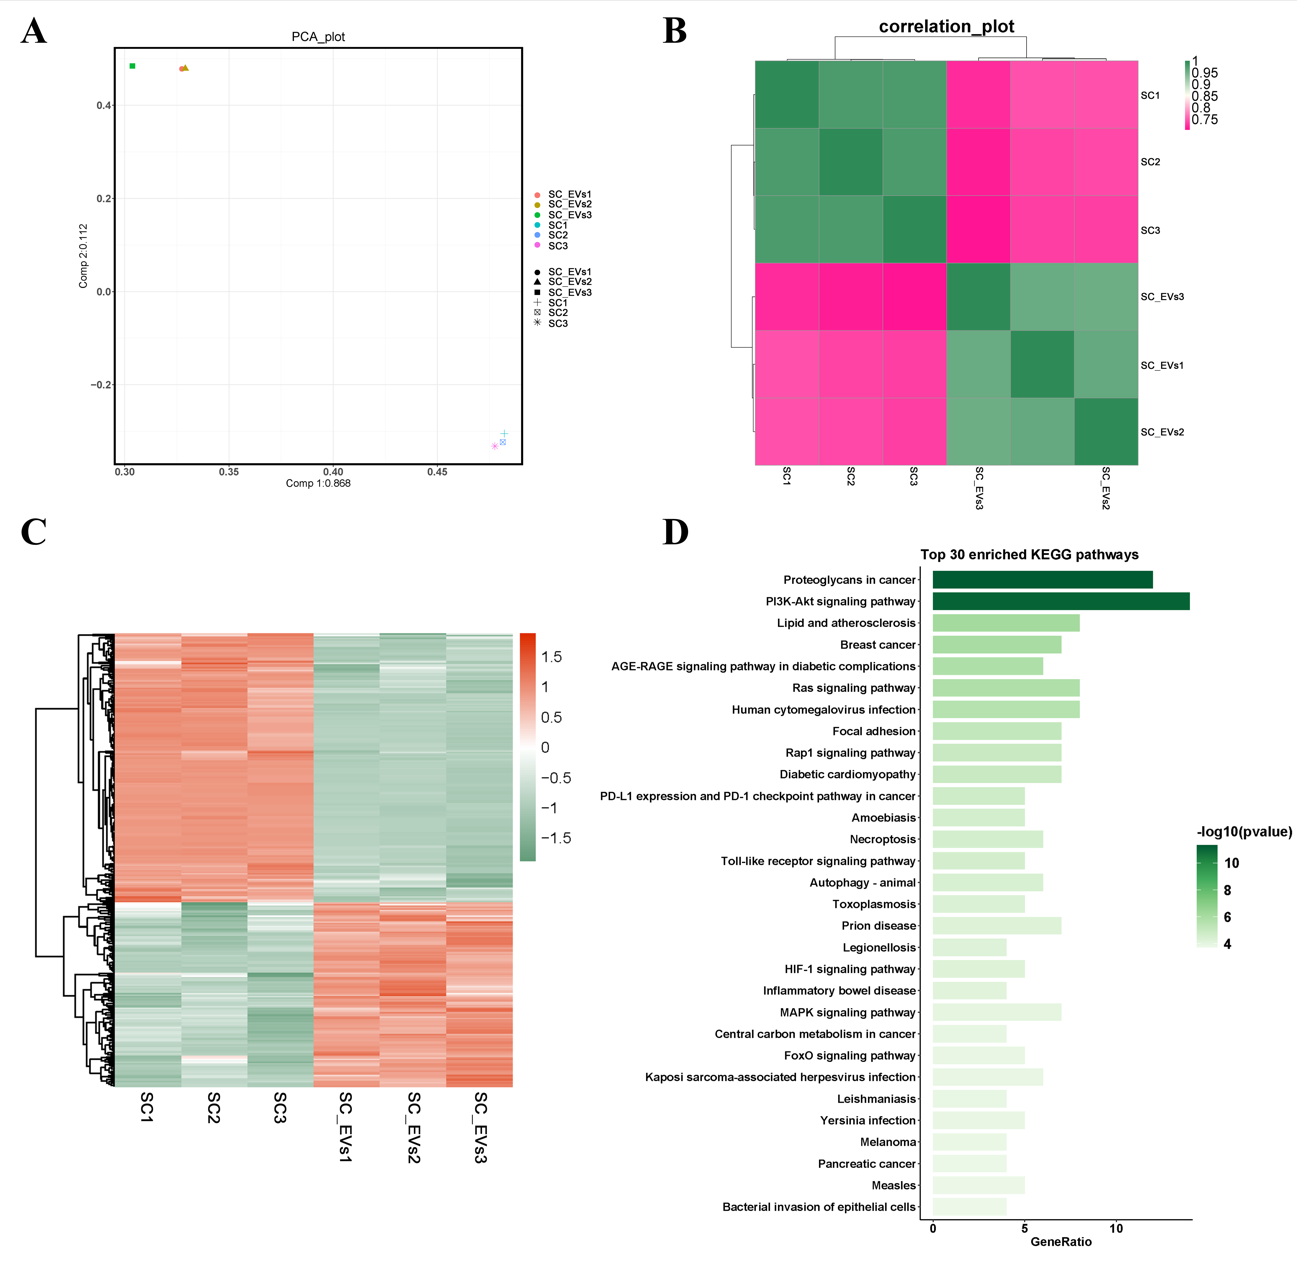


**Fig. S2** Differential miRNA expression profiles between SCs and SC-EVs. **A**) PCA. **B**) Inter-sample correlation. **C**) Heatmap of differentially expressed miRNAs. **D**) KEGG pathway enrichment bar plot


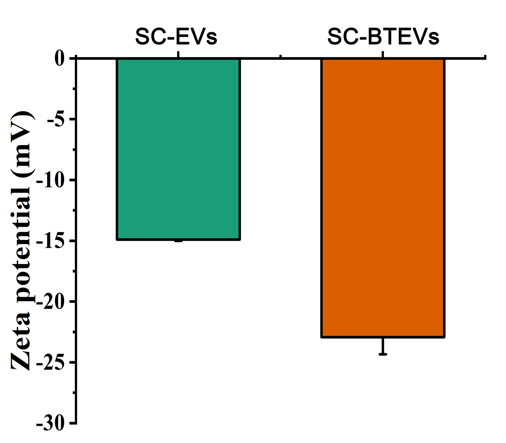


**Fig. S3** Zeta potential of engineered SC-BTEVs by DLS.Zeta potential of engineered SC-BTEVs measured by DLS.


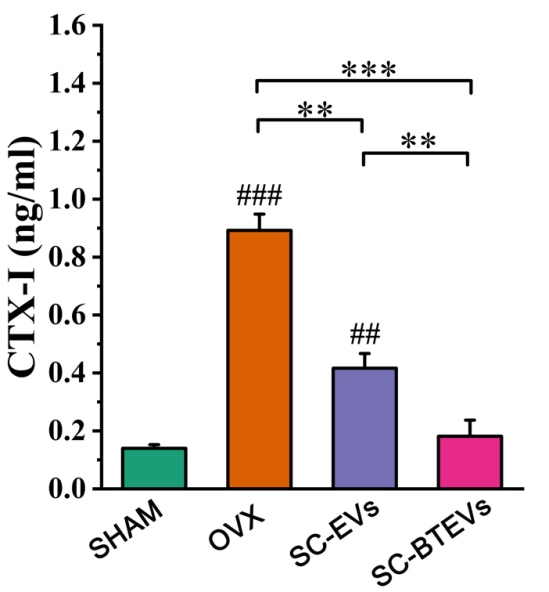


**Fig. S4** Serum levels of the bone resorption marker CTX-I measured by ELISA from mice in different treatment groups. n = 5, **P < 0.05*, ***P < 0.01*, ****P < 0.001*; #*P < 0.05*, ##*P < 0.01*, ###*P < 0.001* vs. SHAM


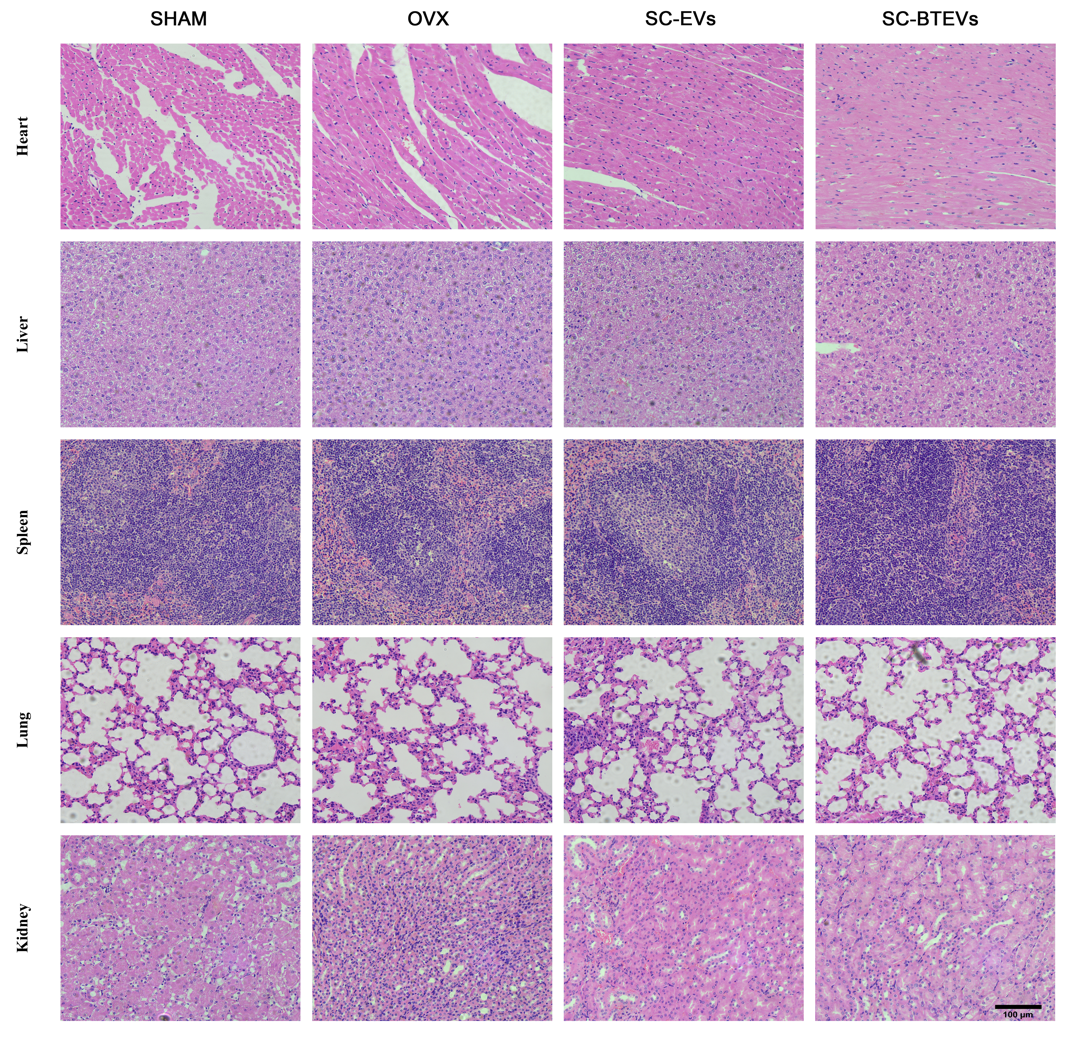


**Fig. S5** H&E staining of heart, liver, spleen, lung, and kidney from mice in different treatment groups

**Table S1** The primers of genes used in the article

| **Gene** | **Primer sequence (5‘ to 3’)** |
| --- | --- |
| **Nfatc1-F** | CACTCCACCCACTTCTGACTTCC |
| **Nfatc1-R** | GGCTGCCTTCCGTCTCATAGTG |
| **ACP5-F** | CACGATGCCAGCGACAAGA |
| **ACP5-R** | TGAAGCGCAAACGGTAGTAAGG |
| **Ctsk-F** | GTTGACTTCCGCAATCCTTACC |
| **Ctsk-R** | CAGCAGAAACTTGAACACCCAC |
| **PTEN-F** | TTGAAGACCATAACCCACCACA |
| **PTEN-R** | ATCATTACACCAGTCCGTCCCT |
| **GAPDH -F** | CCTCGTCCCGTAGACAAAATG |
| **GAPDH -R** | TGAGGTCAATGAAGGGGTCGT |

1. ✝Huijian Yang, Biao Yu, Ruiyang Li and Yang Hong contributed equally to this work.

   ___________________________

   *Correspondence:

   Ke Xu

   kexu@shu.edu.cn

   Yuhai Ma

   [yuhaima@126.com](mailto:yuhaima@126.com)

   Mengmeng Li

   [mengmengli@shu.edu.cn](mailto:mengmengli@shu.edu.cn)

   Jiacan Su

   drsujiacan@163.com

   Full list of author information is available at the end of the article [↑](#footnote-ref-0)
